# Supplementary material for: Diversity and Functions of Endophytic Fungi Associated with Roots and Leaves of Stipa purpurea in an Alpine Steppe at Qinghai-Tibet Plateau
Source: PubMed Central journal article supplement (PMC9728210; doi:10.4014/jmb.2002.02056), 2020-04-23
Supplement: JMB-30-7-1027-supple.pdf [file JMB-30-7-1027-supple.pdf]

**Table S1**

Taxon designation of fungal endophytes from roots and leaves of *S. purpurea* based on sequence data from the internal transcribed spacer regions of nuclear ribosomal RNA (ITS rRNA).

| Genus (stated in GenBank) | Phylum; Subclass; Order;                    | Isolates | ITS (No.)* | Most closely related species**             | % similarity |
|---------------------------|---------------------------------------------|----------|------------|--------------------------------------------|--------------|
| <i>Darksidea</i>          | Ascomycota; Dothideomycetes; Pleosporales   | ZMr06    | MK102695   | <i>Darksidea delta</i> (KP183980)          | 97.23        |
| <i>Saccharicola</i>       | Ascomycota; Dothideomycetes; Pleosporales   | ZMr02    | MK102684   | <i>Saccharicola bicolor</i> (KT367526)     | 100.00       |
| <i>Saccharicola</i>       | Ascomycota; Dothideomycetes; Pleosporales   | ZMr12    | MK102685   | <i>Saccharicola bicolor</i> (AF455415)     | 100.00       |
| <i>Saccharicola</i>       | Ascomycota; Dothideomycetes; Pleosporales   | ZMr21    | MK102687   | <i>Saccharicola bicolor</i> (KP117300)     | 100.00       |
| <i>Saccharicola</i>       | Ascomycota; Dothideomycetes; Pleosporales   | ZMr24    | MK102686   | <i>Saccharicola bicolor</i> (KP276515)     | 100.00       |
| <i>Saccharicola</i>       | Ascomycota; Dothideomycetes; Pleosporales   | ZMr29    | MK102688   | <i>Saccharicola bicolor</i> (MH087100)     | 100.00       |
| <i>Saccharicola</i>       | Ascomycota; Dothideomycetes; Pleosporales   | ZMr35    | MK102689   | <i>Saccharicola bicolor</i> (KM979977)     | 100.00       |
| <i>Saccharicola</i>       | Ascomycota; Dothideomycetes; Pleosporales   | ZMr38    | MK102690   | <i>Saccharicola bicolor</i> (JX981466)     | 99.35        |
| <i>Saccharicola</i>       | Ascomycota; Dothideomycetes; Pleosporales   | ZMr48    | MK102691   | <i>Saccharicola bicolor</i> (KJ188730)     | 99.58        |
| <i>Stagonospora</i>       | Ascomycota; Dothideomycetes; Pleosporales   | ZMr30    | MK102693   | <i>Stagonospora perfecta</i> (KF251258)    | 98.48        |
| <i>Stagonospora</i>       | Ascomycota; Dothideomycetes; Pleosporales   | ZMr44    | MK102694   | <i>Stagonospora perfecta</i> (KF251258)    | 97.23        |
| <i>Paraphoma</i>          | Ascomycota; Dothideomycetes; Pleosporales   | ZMr04    | MK102697   | <i>Paraphoma</i> sp. (KT269100)            | 99.56        |
| <i>Paraphoma</i>          | Ascomycota; Dothideomycetes; Pleosporales   | ZMr11    | MK102698   | <i>Paraphoma</i> sp. (KT269033)            | 100.00       |
| Undefined genus           | Ascomycota; Dothideomycetes; Pleosporales   | ZMr23    | MK102696   | <i>Pleosporales</i> sp. (KT269765)         | 99.56        |
| <i>Phialophora</i>        | Ascomycota; Eurotiomycetes; Chaetothyriales | ZMr28    | MK102700   | <i>Phialophora mustea</i> (JX145398)       | 99.81        |
| <i>Cadophora</i>          | Ascomycota; Leotiomycetes; Helotiales       | ZMr07    | MK102699   | <i>Cadophora</i> sp. (KT264475)            | 99.23        |
| <i>Cadophora</i>          | Ascomycota; Leotiomycetes; Helotiales       | ZMr40    | MK102701   | <i>Cadophora</i> sp. (KT268419)            | 98.89        |
| <i>Scytalidium</i>        | Ascomycota; Leotiomycetes; Helotiales       | ZMr13    | MK102670   | <i>Scytalidium</i> sp. YG-2010a (HQ213805) | 99.35        |
| Undefined genus           | Ascomycota; Leotiomycetes; Helotiales       | ZMr33    | MK102702   | <i>Helotiales</i> sp. r339 (HQ649857)      | 99.84        |

|                      |                                             |       |          |                                              |        |
|----------------------|---------------------------------------------|-------|----------|----------------------------------------------|--------|
| <i>Trichoderma</i>   | Ascomycota; Sordariomycetes; Hypocreales    | ZMr18 | MK102662 | <i>Trichoderma citrinum</i> (DQ865099)       | 92.45  |
| <i>Trichoderma</i>   | Ascomycota; Sordariomycetes; Hypocreales    | ZMr39 | MK102663 | <i>Trichoderma citrinum</i> (KF887057)       | 99.39  |
| <i>Trichoderma</i>   | Ascomycota; Sordariomycetes; Hypocreales    | ZMr19 | MK102667 | <i>Trichoderma</i> sp. (KP714590)            | 95.89  |
| <i>Verticillium</i>  | Ascomycota; Sordariomycetes; Hypocreales    | ZMr25 | MK102671 | <i>Verticillium leptobactrum</i> (KJ188658)  | 98.56  |
| <i>Verticillium</i>  | Ascomycota; Sordariomycetes; Hypocreales    | ZMr26 | MK102672 | <i>Verticillium</i> sp. TF17TTW (FJ948142)   | 97.49  |
| <i>Fusarium</i>      | Ascomycota; Sordariomycetes; Hypocreales    | ZMr01 | MK102655 | <i>Fusarium tricinctum</i> (JQ846085)        | 97.56  |
| <i>Fusarium</i>      | Ascomycota; Sordariomycetes; Hypocreales    | ZMr27 | MK102656 | <i>Fusarium tricinctum</i> (KF010839)        | 99.21  |
| <i>Fusarium</i>      | Ascomycota; Sordariomycetes; Hypocreales    | ZMr09 | MK102659 | <i>Fusarium</i> sp. (JQ388254)               | 100.00 |
| <i>Fusarium</i>      | Ascomycota; Sordariomycetes; Hypocreales    | ZMr41 | MK102657 | <i>Fusarium</i> sp. (JQ388252)               | 99.13  |
| <i>Fusarium</i>      | Ascomycota; Sordariomycetes; Hypocreales    | ZMr42 | MK102660 | <i>Fusarium</i> sp. (AY924269)               | 99.78  |
| <i>Fusarium</i>      | Ascomycota; Sordariomycetes; Hypocreales    | ZMr47 | MK102661 | <i>Fusarium</i> sp. (HQ130669)               | 99.45  |
| <i>Fusarium</i>      | Ascomycota; Sordariomycetes; Hypocreales    | ZMr05 | MK102658 | <i>Fusarium</i> sp. (KT270287)               | 99.49  |
| <i>Myrothecium</i>   | Ascomycota; Sordariomycetes; Hypocreales    | ZMr37 | MK102665 | <i>Myrothecium inundatum</i> (JQ936267)      | 99.59  |
| <i>Stachybotrys</i>  | Ascomycota; Sordariomycetes; Hypocreales    | ZMr22 | MK102664 | <i>Stachybotrys bisbyi</i> (KP256004)        | 99.53  |
| <i>Stachybotrys</i>  | Ascomycota; Sordariomycetes; Hypocreales    | ZMr14 | MK102666 | <i>Stachybotrys</i> sp. HZ-23 (EU301653)     | 99.54  |
| Pyricularia          | Ascomycota; Sordariomycetes; Magnaporthales | ZMr10 | MK102669 | <i>Pyricularia ctenantheicola</i> (KM484878) | 99.79  |
| <i>Slopeiomyces</i>  | Ascomycota; Sordariomycetes; Magnaporthales | ZMr08 | MK102668 | <i>Slopeiomyces cylindrosporu</i> (JF508361) | 98.46  |
| <i>Monosporascus</i> | Ascomycota; Sordariomycetes; Sordariales    | ZMr17 | MK102683 | <i>Monosporascus ibericus</i> (JQ973832)     | 99.47  |
| <i>Microdochium</i>  | Ascomycota; Sordariomycetes; Xylariales     | ZMr03 | MK102681 | <i>Microdochium bolleyi</i> (KT692593)       | 98.12  |
| <i>Microdochium</i>  | Ascomycota; Sordariomycetes; Xylariales     | ZMr15 | MK102679 | <i>Microdochium bolleyi</i> (KC989068)       | 96.41  |
| <i>Microdochium</i>  | Ascomycota; Sordariomycetes; Xylariales     | ZMr16 | MK102676 | <i>Microdochium bolleyi</i> (JQ658340)       | 99.45  |
| <i>Microdochium</i>  | Ascomycota; Sordariomycetes; Xylariales     | ZMr31 | MK102678 | <i>Microdochium bolleyi</i> (AM502264)       | 99.78  |
| <i>Microdochium</i>  | Ascomycota; Sordariomycetes; Xylariales     | ZMr32 | MK102682 | <i>Microdochium bolleyi</i> (KT692593)       | 99.56  |
| <i>Microdochium</i>  | Ascomycota; Sordariomycetes; Xylariales     | ZMr34 | MK102677 | <i>Microdochium bolleyi</i> (MH858255)       | 99.37  |
| <i>Microdochium</i>  | Ascomycota; Sordariomycetes; Xylariales     | ZMr36 | MK102673 | <i>Microdochium bolleyi</i> (KP859010)       | 99.69  |
| <i>Microdochium</i>  | Ascomycota; Sordariomycetes; Xylariales     | ZMr43 | MK102674 | <i>Microdochium bolleyi</i> (KJ188678)       | 99.41  |

|                      |                                           |       |          |                                              |        |
|----------------------|-------------------------------------------|-------|----------|----------------------------------------------|--------|
| <i>Microdochium</i>  | Ascomycota; Sordariomycetes; Xylariales   | ZMr45 | MK102680 | <i>Microdochium bolleyi</i> (HQ703412)       | 100.00 |
| <i>Microdochium</i>  | Ascomycota; Sordariomycetes; Xylariales   | ZMr46 | MK102675 | <i>Microdochium bolleyi</i> (KF646098)       | 99.32  |
| <i>Alternaria</i>    | Ascomycota; Dothideomycetes; Pleosporales | ZMI09 | MK102650 | <i>Alternaria carthami</i> (KJ704213)        | 99.47  |
| <i>Gloeotinia</i>    | Ascomycota; Leotiomycetes; Helotiales     | ZMI01 | MK102637 | <i>Gloeotinia</i> sp. LJC-2011(JF461264)     | 97.48  |
| <i>Heydenia</i>      | Ascomycota; Pezizomycetes ;Pezizales      | ZMI04 | MK102651 | <i>Heydenia alpina</i> (JX171178)            | 95.25  |
| <i>Heydenia</i>      | Ascomycota; Pezizomycetes; Pezizales      | ZMI13 | MK102653 | <i>Heydenia myrsines</i> (KU325128)          | 97.14  |
| <i>Heydenia</i>      | Ascomycota; Pezizomycetes; Pezizales      | ZMI14 | MK102654 | <i>Heydenia alpina</i> (KU325118)            | 97.86  |
| <i>Heydenia</i>      | Ascomycota; Pezizomycetes; Pezizales      | ZMI15 | MK102652 | <i>Heydenia arietina</i> (KF574887)          | 99.25  |
| <i>Simplicillium</i> | Ascomycota; Sordariomycetes; Hypocreales  | ZMI06 | MK102638 | <i>Simplicillium chinense</i> (KP034998)     | 97.47  |
| <i>Fusarium</i>      | Ascomycota; Sordariomycetes; Hypocreales  | ZMI03 | MK102645 | <i>Fusarium</i> sp. MPG-5 (KC894839)         | 99.56  |
| <i>Fusarium</i>      | Ascomycota; Sordariomycetes; Hypocreales  | ZMI07 | MK102641 | <i>Fusarium acuminatum</i> (KT070871)        | 99.47  |
| <i>Fusarium</i>      | Ascomycota; Sordariomycetes; Hypocreales  | ZMI17 | MK102640 | <i>Fusarium pseudograminearum</i> (KP726905) | 100.00 |
| <i>Fusarium</i>      | Ascomycota; Sordariomycetes; Hypocreales  | ZMI10 | MK102642 | <i>Fusarium tricinctum</i> (JX406512)        | 99.47  |
| <i>Fusarium</i>      | Ascomycota; Sordariomycetes; Hypocreales  | ZMI11 | MK102643 | <i>Fusarium tricinctum</i> (KU350729)        | 99.18  |
| <i>Fusarium</i>      | Ascomycota; Sordariomycetes; Hypocreales  | ZMI12 | MK102644 | <i>Fusarium tricinctum</i> (KJ598865)        | 99.19  |
| <i>Fusarium</i>      | Ascomycota; Sordariomycetes; Hypocreales  | ZMI16 | MK102639 | <i>Fusarium tricinctum</i> (KJ598867)        | 95.15  |
| <i>Chaetomium</i>    | Ascomycota; Sordariomycetes; Sordariales  | ZMI08 | MK102648 | <i>Chaetomium murorum</i> (JQ946413)         | 98.89  |
| <i>Chaetomium</i>    | Ascomycota; Sordariomycetes; Sordariales  | ZMI18 | MK102649 | <i>Chaetomium murorum</i> (KT192199)         | 97.48  |
| <i>Thielavia</i>     | Ascomycota; Sordariomycetes; Sordariales  | ZMI05 | MK102647 | <i>Thielavia hyalocarpa</i> (JQ781752)       | 97.59  |
| Undefined genus      | Ascomycota;                               | ZMI02 | MK102646 | <i>Ascomycota</i> sp. (KP698348)             | 96.19  |

\*ITS rDNA sequences of cultural endophytic fungi were deposited at GenBank;

\*\*Matches of ITS rDNA sequences published were also from GenBank.

**Table S2**

The distribution of fungal taxa and isolate number at species, order, and class level.

| <b>Class type (5)<br/>and isolate number</b> | <b>Order type (8)<br/>and isolate number</b> | <b>OTUs(33) at species level<br/>and isolate number</b>                                                                                                                                                                                                                                                                                                                                 |
|----------------------------------------------|----------------------------------------------|-----------------------------------------------------------------------------------------------------------------------------------------------------------------------------------------------------------------------------------------------------------------------------------------------------------------------------------------------------------------------------------------|
| <b>Dothideomycetes(71)</b>                   | Pleosporales (71)                            | <i>Alternaria carthami</i> (2), <i>Darksidea delta</i> (5), <i>Paraphoma</i> sp.(3),<br><i>Pleosporales</i> sp. (1), <i>Saccharicola bicolor</i> (58), <i>Stagonospora perfecta</i> (2),<br><i>Phialophora mustea</i> (9),                                                                                                                                                              |
| <b>Eurotiomycetes(9)</b>                     | Chaetothyriales(9)                           | <i>Cadophora</i> sp.(3), <i>Gloeotinia</i> sp. (5), <i>Helotiales</i> sp. (1), <i>Scytalidium</i> sp. (3),                                                                                                                                                                                                                                                                              |
| <b>Leotiomycetes(12)</b>                     | Helotiales(12)                               | <i>Heydenia alpina</i> (2), <i>Heydenia myrsinea</i> (14), <i>Heydenia arietina</i> (18),                                                                                                                                                                                                                                                                                               |
| <b>Pezizomycetes(34)</b>                     | Pezizales(34)                                | <i>Fusarium acuminatum</i> (4), <i>Fusarium pseudograminearum</i> (1), <i>Fusarium</i> sp.(62),<br><i>Fusarium tricinctum</i> (30), <i>Myrothecium inundatum</i> (1), <i>Simplicillium chinense</i> (2),<br><i>Stachybotrys bisbyi</i> (3), <i>Trichoderma citrinum</i> (3), <i>Trichoderma</i> sp. (3), <i>Verticillium</i><br><i>leptobactrum</i> (10), <i>Verticillium</i> sp.(23) , |
| <b>Sordariomycetes(196)</b>                  | Hypocreales(142)                             | <i>Pyricularia ctenantheicola</i> (1), <i>Slopeiomyces cylindrosporus</i> (1),                                                                                                                                                                                                                                                                                                          |
|                                              | Magnaporthales(2)                            | <i>Chaetomium murorum</i> (9), <i>Monosporascus ibericus</i> (1), <i>Thielavia hyalocarpa</i> (5),                                                                                                                                                                                                                                                                                      |
|                                              | Sordariales(15)                              | <i>Microdochium bolleyi</i> (37),                                                                                                                                                                                                                                                                                                                                                       |
|                                              | Xylariales(37)                               | Undefined genus,                                                                                                                                                                                                                                                                                                                                                                        |
| <b>Ascomycota sp.(1)</b>                     |                                              |                                                                                                                                                                                                                                                                                                                                                                                         |

**Table S3**

The effects of Kruskal-Wallis one-way ANOVA on ranks and Pearson product moment correlation on the endophytic fungal communities of *S. purpurea*.

| Samples*    | Kruskal-Wallis one-way |          | Pearson Product    |                   |
|-------------|------------------------|----------|--------------------|-------------------|
|             | ANOVA on ranks         |          | Moment Correlation |                   |
|             | H                      | <i>p</i> | CC**               | <i>p</i>          |
| Total vs. R | 0.564                  | 0.453    | <b>0.967</b>       | <b>&lt;0.0001</b> |
| Total vs. L | 0.441                  | 0.507    | 0.283              | 0.461             |
| R vs. L     | 0.002                  | 0.964    | 0.029              | 0.941             |

Values in italics indicate significant differences or significant correlations

\* R, root; L, leaf

\*\*CC, correlation coefficient

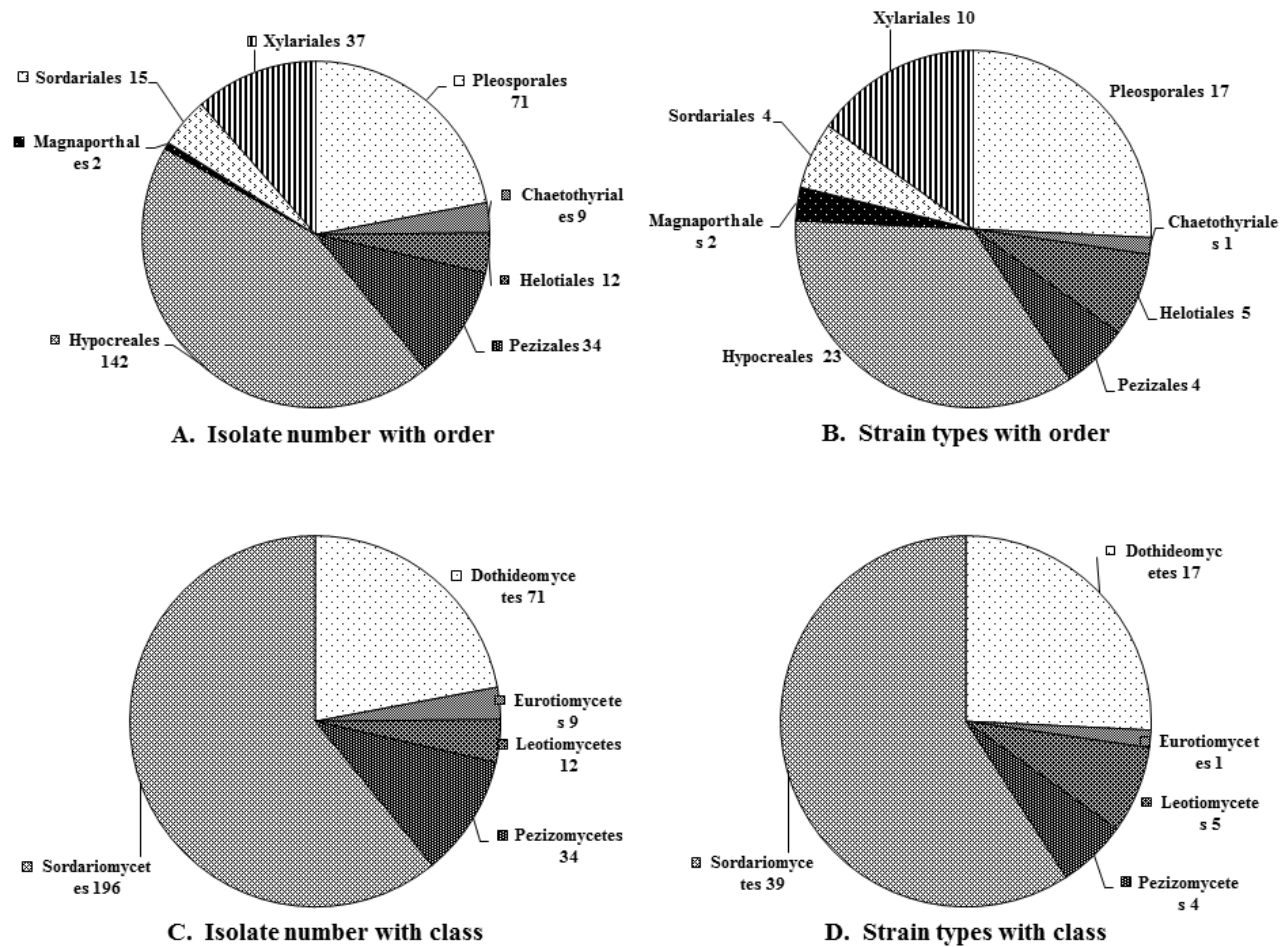

**Fig. S1** The distribution of endophytic fungal isolates from *S. purpurea*. The isolate numbers (A) and strain types (B) at the order level; and the isolate numbers (C) and strain types (D) at the class level.
